# Supplementary material for: An investigation on single crystal growth, structural, thermal and optical properties of a series of organic D–π–A push–pull materials
Source: Royal Society of Chemistry journal article supplement (doi:10.1039/c5ra04907e), 2015-01-01
Supplement: c5ra04907e1.pdf [file c5ra04907e1.pdf]

# An investigation on single crystal growth, structural, thermal and optical properties of a series of organic D- $\pi$ -A push-pull materials

Vinod Kumar Gupta and Ram Adhar Singh\*

Department of Chemistry, Centre of Advanced Study, Faculty of Science, Banaras Hindu University, Varanasi-221 005, INDIA

Email: [prrasingh@gmail.com](mailto:prrasingh@gmail.com)

## Supporting Information

---

|              |                                                          |                         |
|--------------|----------------------------------------------------------|-------------------------|
| <b>I.</b>    | NMR spectra ( $^1\text{H}$ and $^{13}\text{C}$ ).....    | <b>Figs. S1 to S8</b>   |
| <b>II.</b>   | Solubility in 1:2 acetone-methanol mixture.....          | <b>Table S1</b>         |
| <b>III.</b>  | Plots of $1/T$ versus $\ln N_s$ .....                    | <b>Fig. S9</b>          |
| <b>IV.</b>   | Crystal structure study and refinement.....              |                         |
| <b>V</b>     | Bond lengths and bond angles.....                        | <b>Table S2</b>         |
| <b>VI.</b>   | View of C-H... $\pi$ interactions.....                   | <b>Figs. S10 to S12</b> |
| <b>VII</b>   | Orientation of molecules in unit cell.....               | <b>Figs. S13</b>        |
| <b>VIII.</b> | Thermal activation energy plots.....                     | <b>Figs. S14</b>        |
| <b>IX.</b>   | UV-Visible absorption spectra in different solvents..... | <b>Figs. S15</b>        |
| <b>X.</b>    | Fluorescence spectra in different solvents.....          | <b>Figs. S16</b>        |
| <b>XI.</b>   | Lippert-Mataga plots.....                                | <b>Figs. S17</b>        |

---

# I. NMR spectra ( $^1\text{H}$ and $^{13}\text{C}$ )

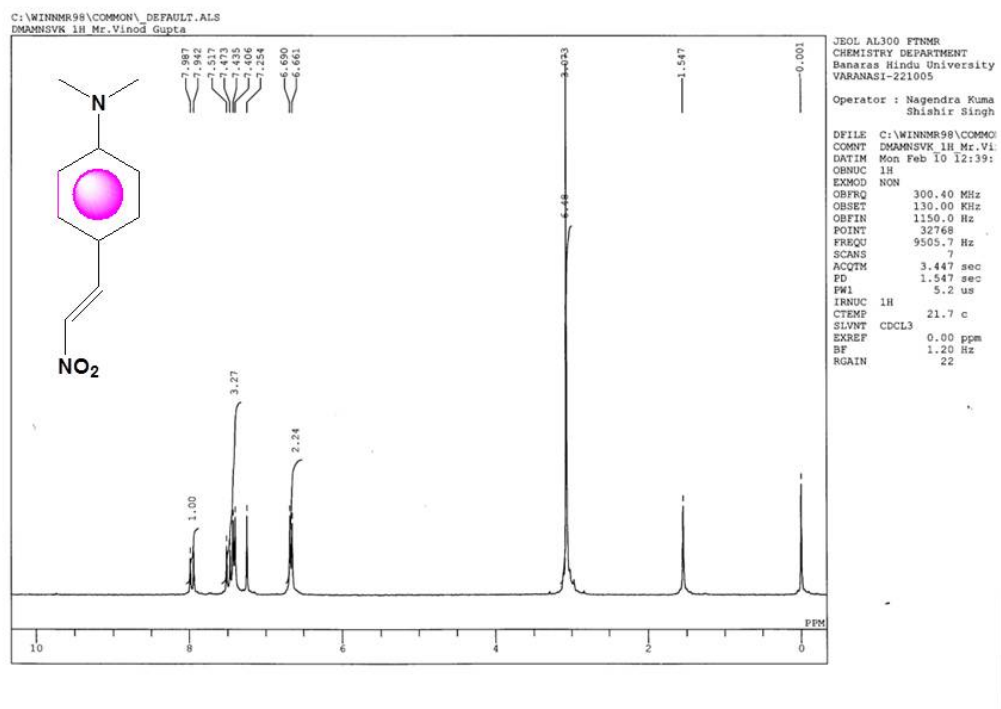

Fig. S1:  $^1\text{H}$  NMR spectrum of chromophore 1

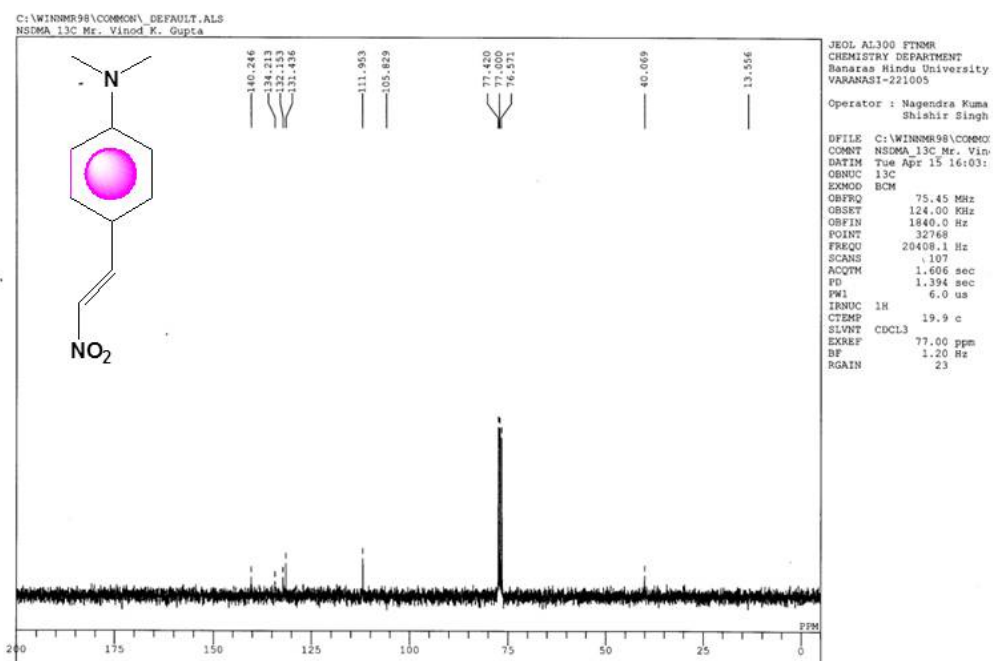

Fig. S2:  $^{13}\text{C}$  NMR spectrum of chromophore 1

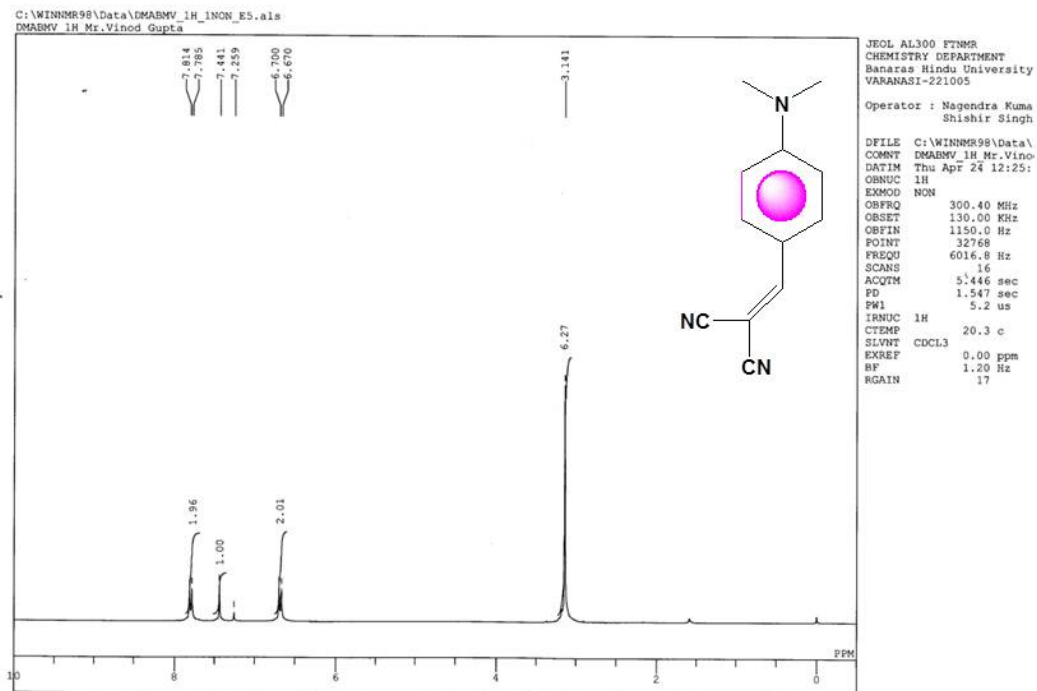

Fig. S3:  $^1\text{H}$  NMR spectrum of chromophore 2

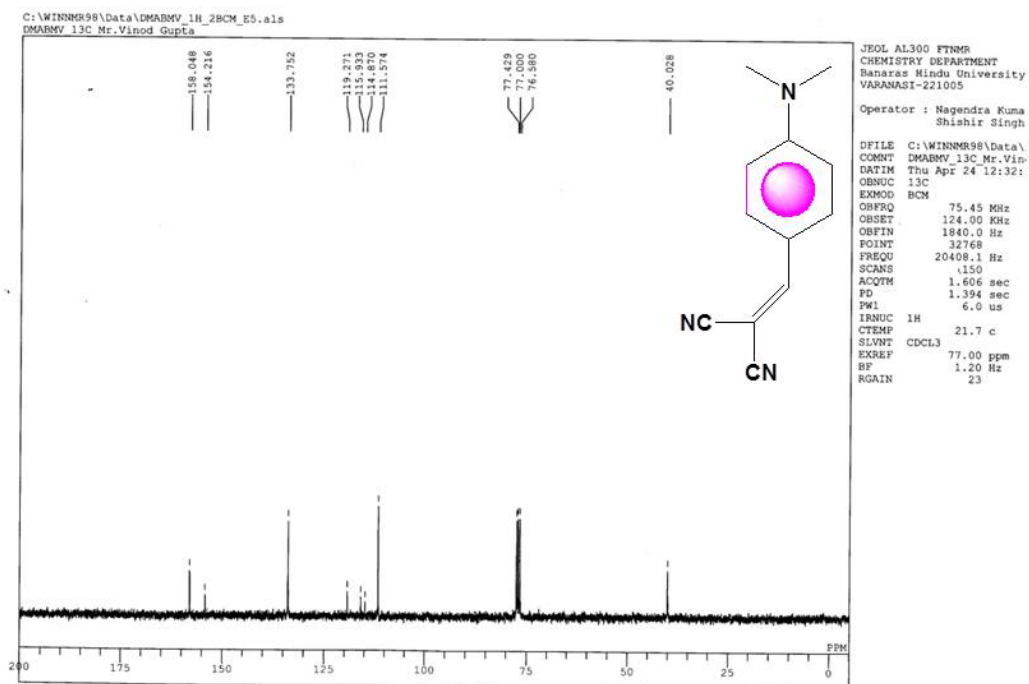

Fig. S4:  $^{13}\text{C}$  NMR spectrum of chromophore 2

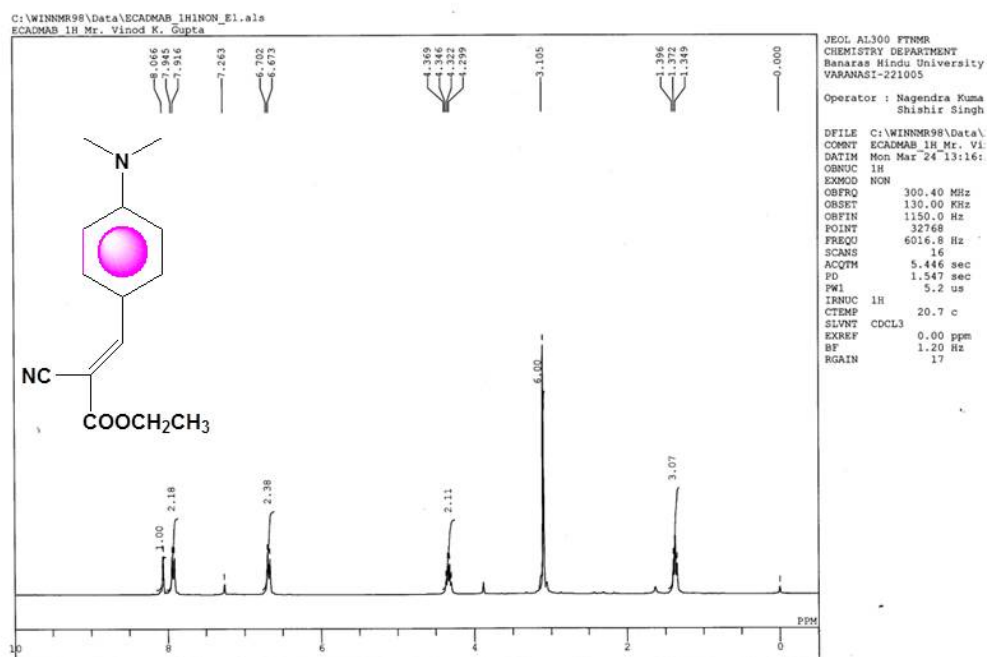

Fig. S5:  $^1\text{H}$  NMR spectrum of chromophore 3

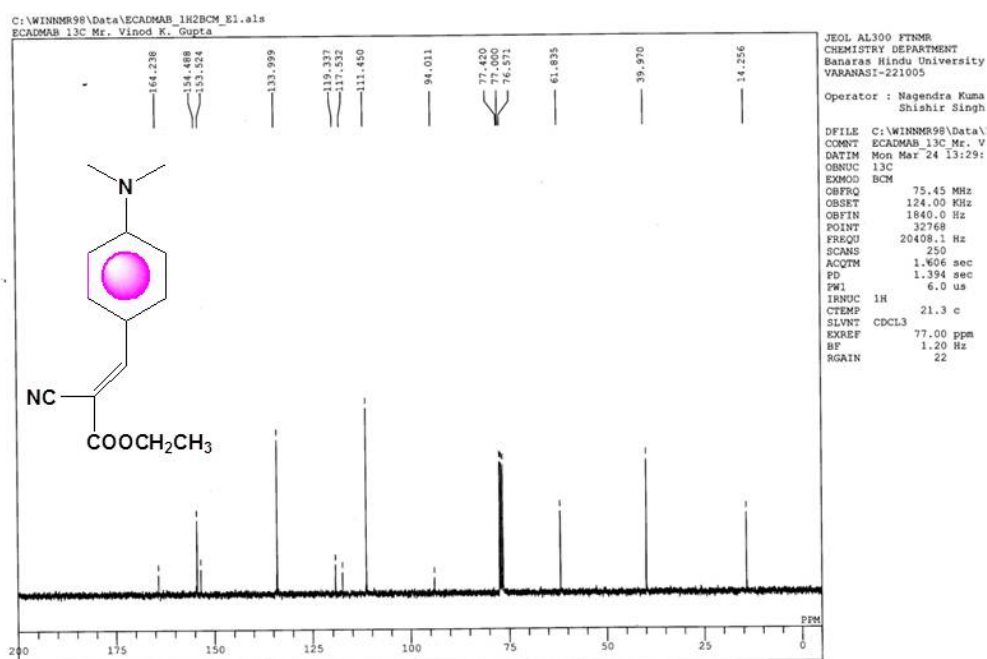

Fig. S6:  $^{13}\text{C}$  NMR spectrum of chromophore 3

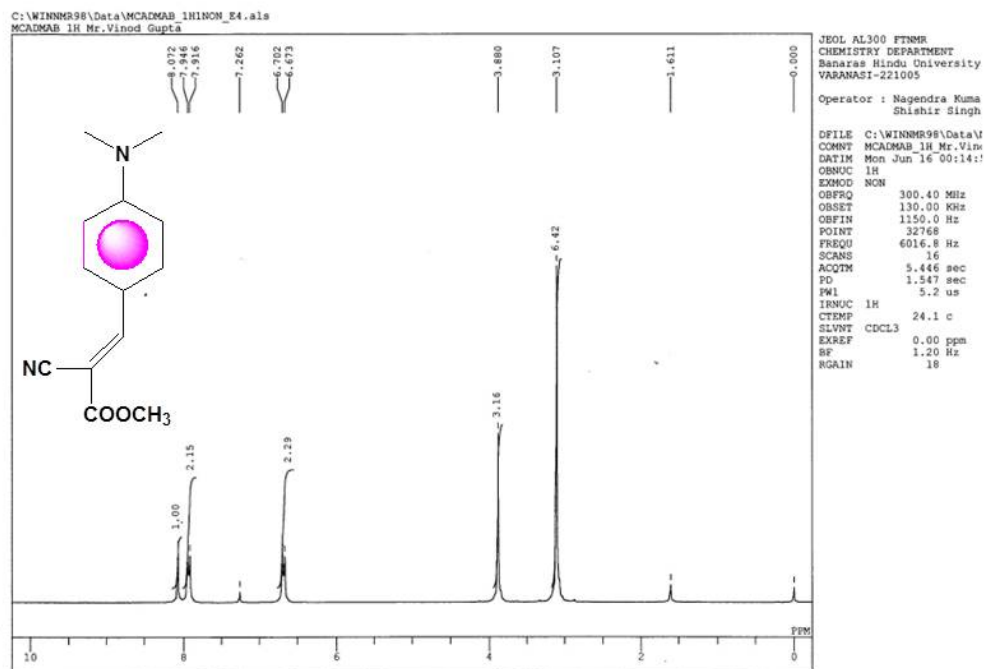

Fig. S7:  $^1\text{H}$  NMR spectrum of chromophore 4

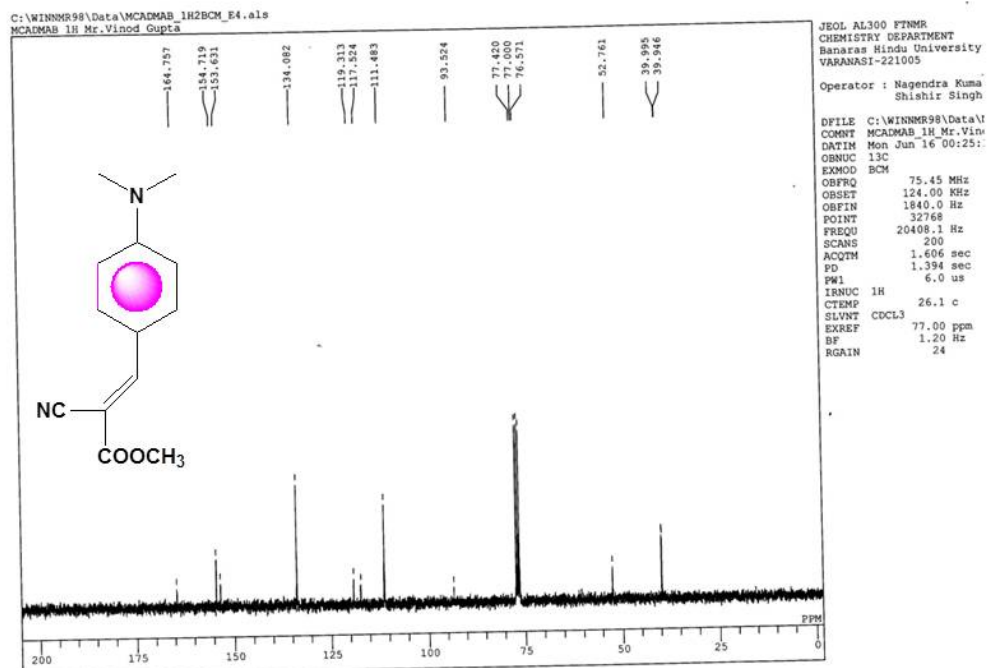

Fig. S8:  $^{13}\text{C}$  NMR spectrum of chromophore 4

## II. Table S1: Solubility in 1:2 acetone-methanol mixture

| Chromophore | Solubility<br>(g/100 g of solvent) <sup>a</sup> |
|-------------|-------------------------------------------------|
| <b>1</b>    | 0.49                                            |
| <b>2</b>    | 0.61                                            |
| <b>3</b>    | 2.60                                            |
| <b>4</b>    | 1.10                                            |

<sup>a</sup>Solubility at 28.0 °C in mixed 1:2 acetone-methanol (by weight) solvent.

## III. Plots of 1/T versus $\ln N_s$

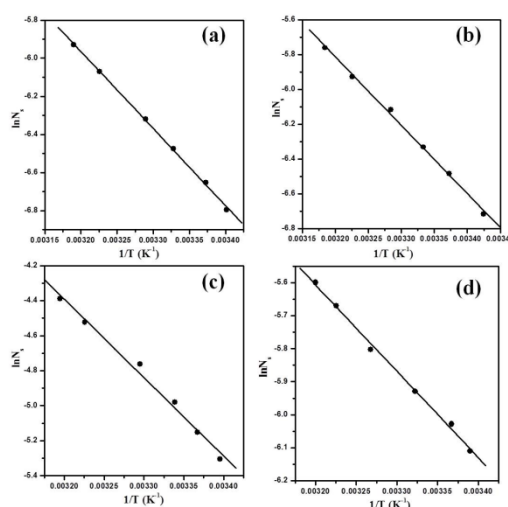

**Fig. S9:** Plot of  $1/T$  versus  $\ln N_s$  for (a) chromophore **1**, (b) chromophore **2**, (c) chromophore **3** and (d) chromophore **4** in 1:1 acetone-methanol mixed solvent.

## IV. Crystal structure study and refinement

For single crystal X-ray diffraction studies, a suitable single crystal of all the chromophores with approximate dimensions were selected and mounted on a glass needle with the help of grease. The crystal's diffractions were recorded by using the Xcalibur oxford CCD diffractometer. The data reduction was carried out using Chrysalis Pro software. The structures were solved by direct method (SHELXL-97) and refined against all data by full matrix least-square on  $F^2$  using anisotropic displacement parameters for all non-hydrogen

atoms. All hydrogen atoms were included in the refinement at geometrically ideal positions and refined with a riding model.

## V. Bond lengths and bond angles

**Table S2:** Bond Lengths (Å) and Bond Angles (deg) in the Structures Studied

| <b>Chromophore 1</b> |          |                     |          |                     |          |
|----------------------|----------|---------------------|----------|---------------------|----------|
| N(2)–C(6)            | 1.359(4) | N(2)–C(10)          | 1.450(4) | N(2)–C(9)           | 1.453(4) |
| C(6)–C(7)            | 1.407(4) | C(6)–C(5)           | 1.415(4) | C(3)–C(4)           | 1.375(4) |
| C(3)–C(8)            | 1.388(5) | C(3)–C(2)           | 1.503(6) | C(8)–C(7)           | 1.389(5) |
| C(8)–H(8)            | 0.9300   | C(5)–C(4)           | 1.363(4) | C(5)–H(5)           | 0.9300   |
| C(7)–H(7)            | 0.9300   | C(4)–H(4)           | 0.9300   | C(10)–H(10A)        | 0.9600   |
| C(10)–H(10B)         | 0.9600   | C(10)–H(10C)        | 0.9600   | C(2)–C(1)           | 1.238(6) |
| C(2)–H(2)            | 0.9300   | C(9)–H(9A)          | 0.9600   | C(9)–H(9B)          | 0.9600   |
| C(9)–H(9C)           | 0.9600   | O(2)–N(1)           | 1.238(5) | N(1)–O(1)           | 1.220(5) |
| N(1)–C(1)            | 1.443(5) | C(1)–H(1)           | 0.9300   |                     |          |
| C(6)–N(2)–C(10)      | 121.4(3) | C(6)–N2–C(9)        | 120.9(3) | C(10)–N(2)–C(9)     | 117.1(3) |
| N(2)–C(6)–C(7)       | 123.1(3) | N(2)–C(6)–C(5)      | 121.1(3) | C(7)–C(6)–C(5)      | 115.8(3) |
| C(4)–C(3)–C(8)       | 116.3(3) | C(4)–C(3)–C(2)      | 117.5(3) | C(8)–C(3)–C(2)      | 126.2(3) |
| C(3)–C(8)–C(7)       | 122.3(3) | C(3)–C(8)–H(8)      | 118.8    | C(7)–C(8)–H(8)      | 118.8    |
| C(4)–C(5)–C(6)       | 121.4(3) | C(4)–C(5)–H(5)      | 119.3    | C(6)–C(5)–H(5)      | 119.3    |
| C(8)–C(7)–C(6)       | 120.9(3) | C(8)–C(7)–H(7)      | 119.6    | C(6)–C(7)–H(7)      | 119.6    |
| C(5)–C(4)–C(3)       | 123.2(3) | C(5)–C(4)–H(4)      | 118.4    | C(3)–C(4)–H(4)      | 118.4    |
| N(2)–C(10)–H(10A)    | 109.5    | N(2)–C(10)–H(10B)   | 109.5    | H(10A)–C(10)–H(10B) | 109.5    |
| N(2)–C(10)–H(10C)    | 109.5    | H(10A)–C(10)–H(10C) | 109.5    | H(10B)–C(10)–H(10C) | 109.5    |
| C(1)–C(2)–C(3)       | 126.7(5) | C(1)–C(2)–H(2)      | 116.7    | C(3)–C(2)–H(2)      | 116.7    |
| N(2)–C(9)–H(9A)      | 109.5    | N(2)–C(9)–H(9B)     | 109.5    | H9(A)–C(9)–H(9B)    | 109.5    |
| N(2)–C(9)–H(9C)      | 109.5    | H(9A)–C(9)–H(9C)    | 109.5    | H(9B)–C(9)–H(9C)    | 109.5    |
| O(1)–N(1)–O(2)       | 122.6(4) | O(1)–N(1)–C(1)      | 113.1(5) | O(2)–N(1)–C(1)      | 124.3(4) |
| C(2)–C(1)–N(1)       | 120.6(5) | C(2)–C(1)–H(1)      | 119.7    | N(1)–C(1)–H(1)      | 119.7    |
| <b>Chromophore 2</b> |          |                     |          |                     |          |
| N(1)–C(1)            | 1.352(4) | N(1)–C(11)          | 1.453(4) | N(1)–C(12)          | 1.455(4) |
| C(2)–C(3)            | 1.375(4) | C(2)–C(1)           | 1.395(4) | C(2)–H(2)           | 0.9300   |
| C(4)–C(3)            | 1.386(4) | C(4)–C(5)           | 1.415(4) | C(4)–C(7)           | 1.422(4) |
| C(1)–C(6)            | 1.406(4) | C(6)–C(5)           | 1.373(3) | C(6)–H(6)           | 0.9300   |
| C(5)–H(5)            | 0.9300   | C(3)–H(3)           | 0.9300   | C(8)–C(7)           | 1.367(4) |
| C(8)–C(9)            | 1.417(4) | C(8)–C(10)          | 1.430(4) | C(7)–H(7)           | 0.9300   |
| C(11)–H(11B)         | 0.9600   | C(11)–H(11C)        | 0.9600   | C(11)–H(11A)        | 0.9600   |
| C(12)–H(12B)         | 0.9600   | C(12)–H(12C)        | 0.9600   | C(12)–H(12A)        | 0.9600   |
| N(3)–C(9)            | 1.143(4) | C(10)–N(2)          | 1.127(4) |                     |          |
| C(1)–N(1)–C(11)      | 122.3(3) | C(1)–N(1)–C(12)     | 121.3(3) | C(11)–N(1)–C(12)    | 116.4(3) |
| C(3)–C(2)–C(1)       | 120.4(4) | C(3)–C(2)–H(2)      | 119.8    | C(1)–C(2)–H(2)      | 119.8    |
| C(3)–C(4)–C(5)       | 116.3(3) | C(3)–C(4)–C(7)      | 118.7(3) | C(5)–C(4)–C(7)      | 125.0(3) |
| N(1)–C(1)–C(2)       | 121.2(3) | N(1)–C(1)–C(6)      | 121.1(3) | C(2)–C(1)–C(6)      | 117.6(3) |
| C(5)–C(6)–C(1)       | 121.2(3) | C(5)–C(6)–H(6)      | 119.4    | C(1)–C(6)–H(6)      | 119.4    |
| C(6)–C(5)–C(4)       | 121.4(3) | C(6)–C(5)–H(5)      | 119.3    | C(4)–C(5)–H(5)      | 119.3    |
| C(2)–C(3)–C(4)       | 123.1(3) | C(2)–C(3)–H(3)      | 118.5    | C(4)–C(3)–H(3)      | 118.5    |
| C(7)–C(8)–C(9)       | 119.3(3) | C(7)–C(8)–C(10)     | 125.6(3) | C(9)–C(8)–C(10)     | 114.9(4) |
| C(8)–C(7)–C(4)       | 132.0(3) | C(8)–C(7)–H(7)      | 114.0    | C(4)–C(7)–H(7)      | 114.0    |
| N(1)–C(11)–H(11B)    | 109.5    | N(1)–C(11)–H(11C)   | 109.5    | H(11B)–C(11)–H(11C) | 109.5    |
| N(1)–C(11)–H(11A)    | 109.5    | H(11B)–C(11)–H(11A) | 109.5    | H(11C)–C(11)–H(11A) | 109.5    |
| N(1)–C(12)–H(12B)    | 109.5    | N(1)–C(12)–H(12C)   | 109.5    | H(12B)–C(12)–H(12C) | 109.5    |
| N(1)–C(12)–H(12A)    | 109.5    | H(12B)–C(12)–H(12A) | 109.5    | H(12C)–C(12)–H(12A) | 109.5    |
| N(2)–C(10)–C(8)      | 177.7(5) | N(3)–C(9)–C(8)      | 178.0(4) |                     |          |

| <b>Chromophore 3</b> |            |                     |            |                    |            |
|----------------------|------------|---------------------|------------|--------------------|------------|
| N(2)–C(4)            | 1.3568(17) | N(2)–C(14)          | 1.442(2)   | N(2)–C(13)         | 1.4564(19) |
| C(1)–C(6)            | 1.405(2)   | C(1)–C(2)           | 1.4059(18) | C(1)–C(7)          | 1.4316(19) |
| C(7)–C(8)            | 1.3550(19) | C(7)–H(7)           | 0.9300     | C(6)–C(5)          | 1.371(2)   |
| C(6)–H(6)            | 0.9300     | C(2)–C(3)           | 1.3630(19) | C(2)–H(2)          | 0.9300     |
| C(5)–C(4)            | 1.4147(19) | C(5)–H(5)           | 0.9300     | O(2)–C(10)         | 1.3418(18) |
| O(2)–C(11)           | 1.452(2)   | C(8)–C(9)           | 1.429(2)   | C(8)–C(10)         | 1.481(2)   |
| C(10)–O(1)           | 1.1990(19) | C(3)–C(4)           | 1.409(2)   | C(3)–H(3)          | 0.9300     |
| C(14)–H(14)          | 0.9600     | C(14)–H(14C)        | 0.9600     | C(14)–H(14B)       | 0.9600     |
| C(9)–N(1)            | 1.141(2)   | C(13)–H(13A)        | 0.9600     | C(13)–H(13C)       | 0.9600     |
| C(13)–H(13B)         | 0.9600     | C(11)–C(12)         | 1.466(3)   | C(11)–H(11B)       | 0.9700     |
| C(11)–H(11A)         | 0.9700     | C(12)–H(12C)        | 0.9600     | C(12)–H(12B)       | 0.960      |
| C(12)–H(12A)         | 0.9600     |                     |            |                    |            |
| C(4)–N(2)–C(14)      | 121.07(12) | C(4)–N(2)–C(13)     | 120.95(13) | C(14)–N(2)–C(13)   | 117.42(13) |
| C(6)–C(1)–C(2)       | 115.95(12) | C(6)–C(1)–C(7)      | 126.39(12) | C(2)–C(1)–C(7)     | 117.67(13) |
| C(8)–C(7)–C(1)       | 132.63(15) | C(8)–C(7)–H(7)      | 113.7      | C(1)–C(7)–H(7)     | 113.7      |
| C(5)–C(6)–C(1)       | 122.04(13) | C(5)–C(6)–H(6)      | 119.0      | C(1)–C(6)–H(6)     | 119.0      |
| C(3)–C(2)–C(1)       | 122.80(13) | C(3)–C(2)–H(2)      | 118.6      | C(1)–C(2)–H(2)     | 118.6      |
| C(6)–C(5)–C(4)       | 121.45(13) | C(6)–C(5)–H(5)      | 119.3      | C(4)–C(5)–H(5)     | 119.3      |
| C(10)–O(2)–C(11)     | 117.12(15) | C(7)–C(8)–C(9)      | 123.62(14) | C(7)–C(8)–C(10)    | 118.60(14) |
| C(9)–C(8)–C(10)      | 117.78(13) | O(1)–C(10)–O(2)     | 123.94(15) | O(1)–C(10)–C(8)    | 124.21(14) |
| O(2)–C(10)–C(8)      | 111.85(14) | C(2)–C(3)–C(4)      | 121.19(13) | C(2)–C(3)–H(3)     | 119.4      |
| C(4)–C(3)–H(3)       | 119.4      | N(2)–C(14)–H(14)    | 109.5      | N(2)–C(14)–H(14C)  | 109.5      |
| H(14)–C(14)–H(14C)   | 109.5      | N(2)–C(14)–H(14B)   | 109.5      | H(14)–C(14)–H(14B) | 109.5      |
| H(14C)–C(14)–H(14B)  | 109.5      | N(1)–C(9)–C(8)      | 179.70(17) | N(2)–C(13)–H(13A)  | 109.5      |
| N(2)–C(13)–H(13C)    | 109.5      | H(13A)–C(13)–H(13C) | 109.5      | N(2)–C(13)–H(13B)  | 109.5      |
| H(13A)–C(13)–H(13B)  | 109.5      | H(13C)–C(13)–H(13B) | 109.5      | O(2)–C(11)–C(12)   | 112.21(16) |
| O(2)–C(11)–H(11B)    | 109.2      | C(12)–C(11)–H(11B)  | 109.2      | O(2)–C(11)–H(11A)  | 109.2      |
| C(12)–C(11)–H(11A)   | 109.2      | H(11B)–C(11)–H(11A) | 107.9      | C(11)–C(12)–H(12C) | 109.5      |
| C(11)–C(12)–H(12B)   | 109.5      | H(12C)–C(12)–H(12B) | 109.5      | C(11)–C(12)–H(12A) | 109.5      |
| H(12C)–C(12)–H(12A)  | 109.5      | H(12B)–C(12)–H(12A) | 109.5      | N(2)–C(4)–C(3)     | 121.82(12) |
| N(2)–C(4)–C(5)       | 121.62(13) | C(3)–C(4)–C(5)      | 116.56(13) |                    |            |
|                      |            |                     |            |                    |            |
| <b>Chromophore 4</b> |            |                     |            |                    |            |
| C(7)–C(8)            | 1.352(2)   | C(7)–C(1)           | 1.438(2)   | C(7)–H(7)          | 0.9300     |
| O(2)–C(10)           | 1.343(2)   | O(2)–C(11)          | 1.437(2)   | N(1)–C(4)          | 1.361(2)   |
| N(1)–C(13)           | 1.443(2)   | N(1)–C(12)          | 1.445(2)   | C(4)–C(5)          | 1.404(2)   |
| C(4)–C(3)            | 1.410(2)   | C(8)–C(9)           | 1.431(2)   | C(8)–C(10)         | 1.473(2)   |
| O(1)–C(10)           | 1.197(2)   | C(9)–N(2)           | 1.145(2)   | C(6)–C(5)          | 1.366(2)   |
| C(6)–C(1)            | 1.396(2)   | C(6)–H(6)           | 0.9300     | C(1)–C(2)          | 1.399(2)   |
| C(5)–H(5)            | 0.9300     | C(2)–C(3)           | 1.362(2)   | C(2)–H(2)          | 0.9300     |
| C(3)–H(3)            | 0.9300     | C(13)–H(13A)        | 0.9600     | C(13)–H(13B)       | 0.9600     |
| C(13)–H(13C)         | 0.9600     | C(12)–H(12A)        | 0.9600     | C(12)–H(12B)       | 0.9600     |
| C(12)–H(12C)         | 0.9600     | C(11)–H(11A)        | 0.9600     | C(11)–H(11B)       | 0.9600     |
| C(11)–H(11C)         | 0.9600     |                     |            |                    |            |
| C(8)–C(7)–C(1)       | 132.04(16) | C(8)–C(7)–H(7)      | 114.0      | C(1)–C(7)–H(7)     | 114.0      |
| C(10)–O(2)–C(11)     | 116.09(15) | C(4)–N(1)–C(13)     | 120.85(15) | C(4)–N(1)–C(12)    | 121.09(15) |
| C(13)–N(1)–C(12)     | 118.06(14) | N(1)–C(4)–C(5)      | 122.15(15) | N(1)–C(4)–C(3)     | 121.44(15) |
| C(5)–C(4)–C(3)       | 116.41(14) | C(7)–C(8)–C(9)      | 124.43(15) | C(7)–C(8)–C(10)    | 118.55(15) |
| C(9)–C(8)–C(10)      | 117.02(14) | N(2)–C(9)–C(8)      | 179.6(2)   | C(5)–C(6)–C(1)     | 122.44(16) |
| C(5)–C(6)–H(6)       | 118.8      | C(1)–C(6)–H(6)      | 118.8      | C(6)–C(1)–C(2)     | 116.40(14) |
| C(6)–C(1)–C(7)       | 118.03(15) | C(2)–C(1)–C(7)      | 125.57(15) | C(6)–C(5)–C(4)     | 121.17(16) |
| C(6)–C(5)–H(5)       | 119.4      | C(4)–C(5)–H(5)      | 119.4      | C(3)–C(2)–C(1)     | 121.81(16) |
| C(3)–C(2)–H(2)       | 119.1      | C(1)–C(2)–H(2)      | 119.1      | O(1)–C(10)–O(2)    | 122.75(16) |
| O(1)–C(10)–C(8)      | 125.15(16) | O(2)–C(10)–C(8)     | 112.08(15) | C(2)–C(3)–C(4)     | 121.74(16) |
| C(2)–C(3)–H(3)       | 119.1      | C(4)–C(3)–H(3)      | 119.1      | N(1)–C(13)–H(13A)  | 109.5      |
| N(1)–C(13)–H(13B)    | 109.5      | H(13A)–C(13)–H(13B) | 109.5      | N(1)–C(13)–H(13C)  | 109.5      |
| H(13A)–C(13)–H(13C)  | 109.5      | H(13B)–C(13)–H(13C) | 109.5      | N(1)–C(12)–H(12A)  | 109.5      |
| N(1)–C(12)–H(12B)    | 109.5      | H(12A)–C(12)–H(12B) | 109.5      | N(1)–C(12)–H(12C)  | 109.5      |
| H(12A)–C(12)–H(12C)  | 109.5      | H(12B)–C(12)–H(12C) | 109.5      | O(2)–C(11)–H(11A)  | 109.5      |
| O(2)–C(11)–H(11B)    | 109.5      | H(11A)–C(11)–H(11B) | 109.5      | O(2)–C(11)–H(11C)  | 109.5      |
| H(11A)–C(11)–H(11C)  | 109.5      | H(11B)–C(11)–H(11C) | 109.5      |                    |            |



## VI. View of C–H... $\pi$ interactions

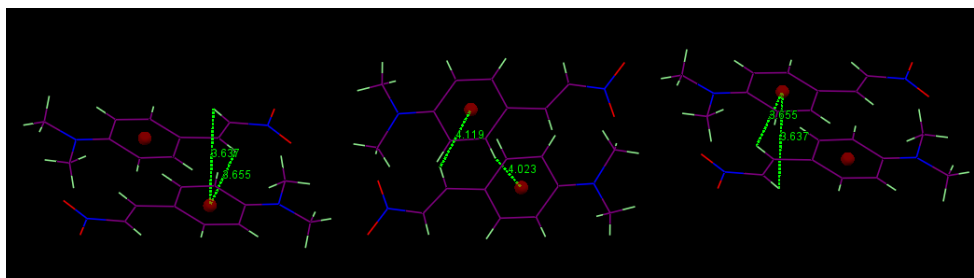

**Fig. S10:** View of C–H... $\pi$  interactions in chromophore 1

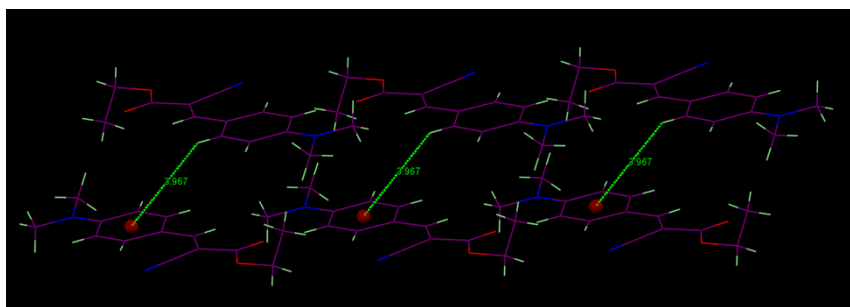

**Fig. S11:** View of C–H... $\pi$  interactions in chromophore 3

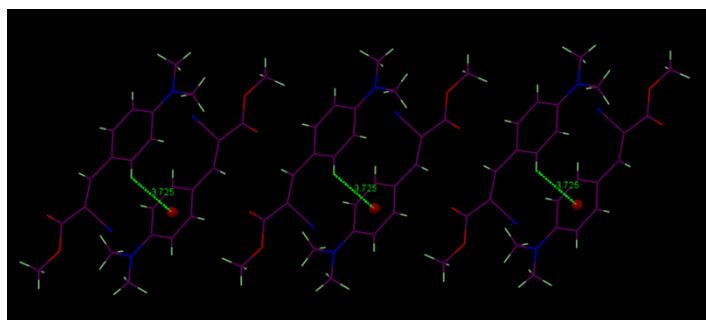

**Fig. S12:** View of C–H... $\pi$  interactions in chromophore 4

## VII. Orientation of molecules in unit cell

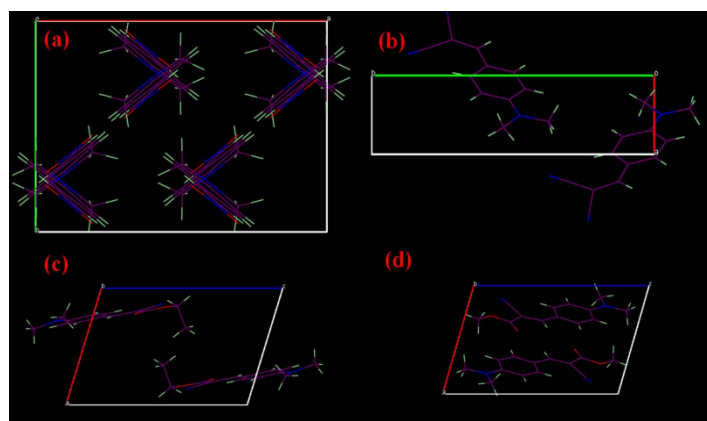

**Fig. S13:** Orientation of chromophores (a) 1, (b) 2, (c) 3 and (d) 4 in unit cell.

## VIII. Thermal activation energy plots

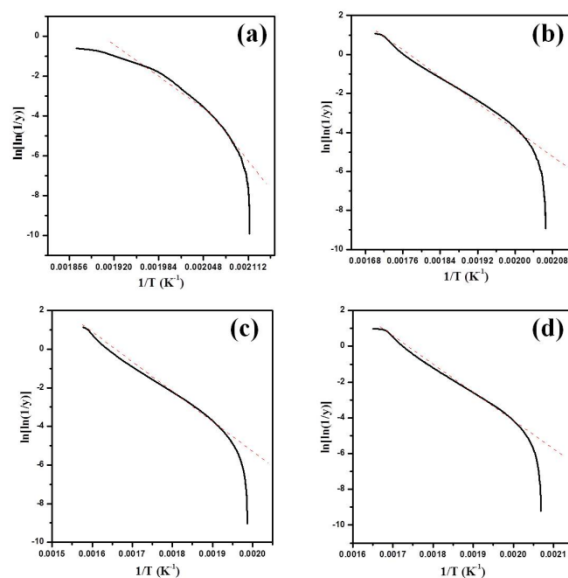

**Fig. S14:** Thermal activation energy plots of (a) chromophore 1, (b) chromophore 2, (c) chromophore 3 and (d) chromophore 4.

## IX. UV-Vis. absorption spectra in different solvents

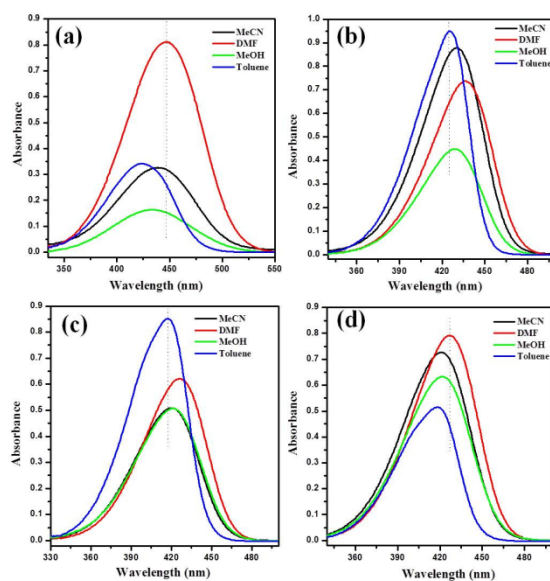

**Fig. S15:** Absorption spectra of (a) chromophore 1, (b) chromophore 2, (c) chromophore 3 and (d) chromophore 4; in different solvents with molar concentration  $1.0 \times 10^{-5}$  M.

## X. Fluorescence spectra in different solvents

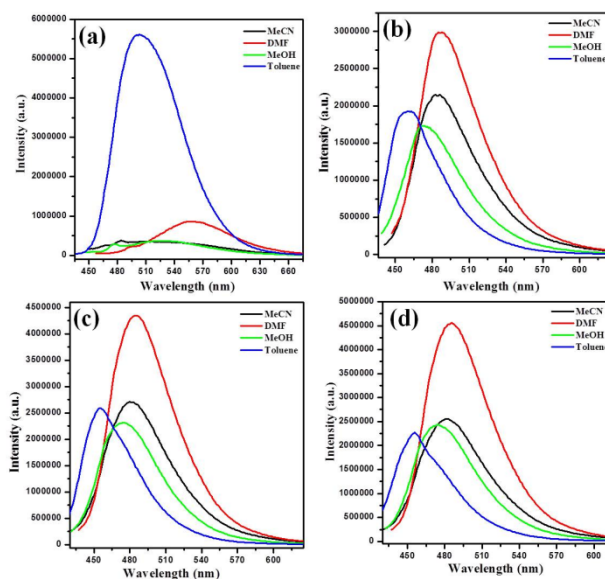

**Fig. S16:** Fluorescence spectra of (a) chromophore 1, (b) chromophore 2, (c) chromophore 3 and (d) chromophore 4; in different solvents with molar concentration  $1.0 \times 10^{-5}$  M.

## XI. Lippert-Mataga plots

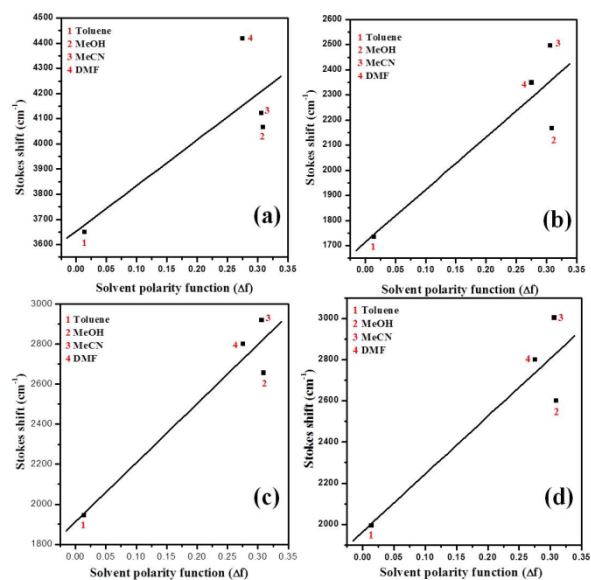

**Fig. S17:** Lippert-Mataga plots of Stokes shift against the solvent polarity function ( $\Delta f$ ) for (a) chromophore 1, (b) chromophore 2, (c) chromophore 3 and (d) chromophore 4.
